# Supplementary material
Source: PubMed Central journal article supplement (PMC2951444)
Supplement: 0914056107_pnas.200914056SI.pdf [file 0914056107_pnas.200914056SI.pdf]

# Supporting Information

Newman et al. 10.1073/pnas.0914056107

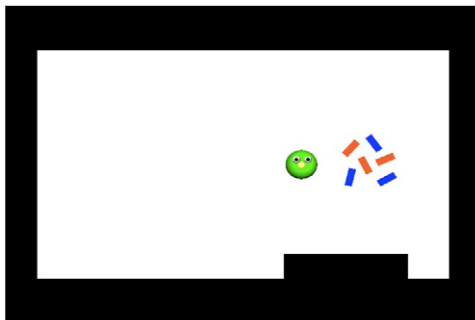

**Movie S1.** Experiment 2: animate disorder. This movie was presented to infants in the agent conditions of experiment 2 and showed an event in which a computer-animated agent appeared to change an ordered arrangement of blocks into a disordered pile.

[Movie S1](#)

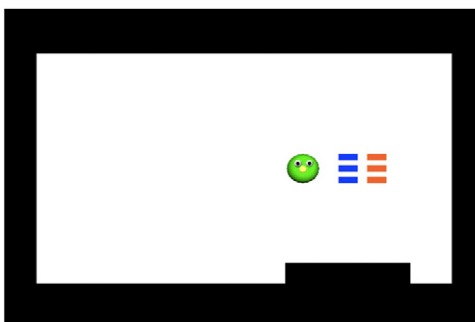

**Movie S2.** Experiment 2: animate order. This movie was presented to infants in the agent conditions of experiment 2 and showed an event in which a computer-animated agent appeared to change a disordered pile of blocks into an ordered arrangement.

[Movie S2](#)

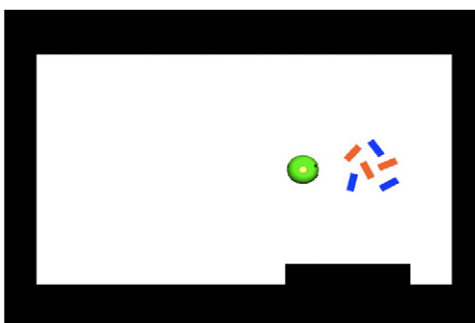

**Movie S3.** Experiment 2: inanimate disorder. This movie was presented to infants in the ball conditions of experiment 2 and showed an event in which a computer-animated ball appeared to change an ordered arrangement of blocks into a disordered pile.

[Movie S3](#)

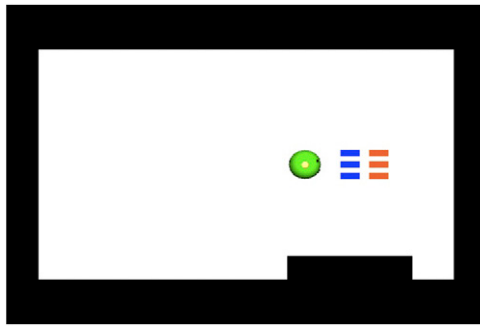

**Movie S4.** Experiment 2: inanimate order. This movie was presented to infants in the ball conditions of experiment 2 and showed an event in which a computer-animated ball appeared to change a disordered pile of blocks into an ordered arrangement.

[Movie S4](#)

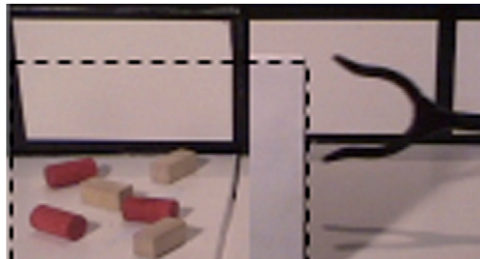

**Movie S5.** Experiment 3: familiarization claw disorder. This movie was presented to infants in the claw-disordering conditions during the familiarization phase of experiment 3 and showed an event in which an inanimate claw appeared to change an ordered arrangement of blocks into a disordered pile.

[Movie S5](#)

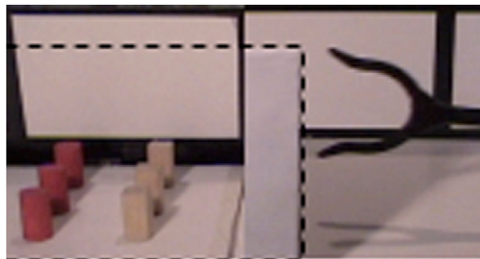

**Movie S6.** Experiment 3: familiarization claw order. This movie was presented to infants in the claw-ordering conditions during the familiarization phase of experiment 3 and showed an event in which an inanimate claw appeared to change a disordered pile of blocks into an ordered arrangement.

[Movie S6](#)
